# Supplementary material for: miR-20b promotes growth of non-small cell lung cancer through a positive feedback loop of the Wnt/β-catenin signaling pathway
Source: PubMed Central journal article supplement — Int J Oncol. 2019 Dec 13;56(2):470–9. doi: 10.3892/ijo.2019.4940 (PMC6959373; doi:10.3892/ijo.2019.4940), 2019-12-13

Figure S1.  $\beta$ -catenin expression changes in different cellular compartments.  $\beta$ -catenin expression in the cytoplasm and nucleus was determined by western blotting in H1975 cells transfected with miR-20b mimic or miR-NC. miR, microRNA; NC, negative control.

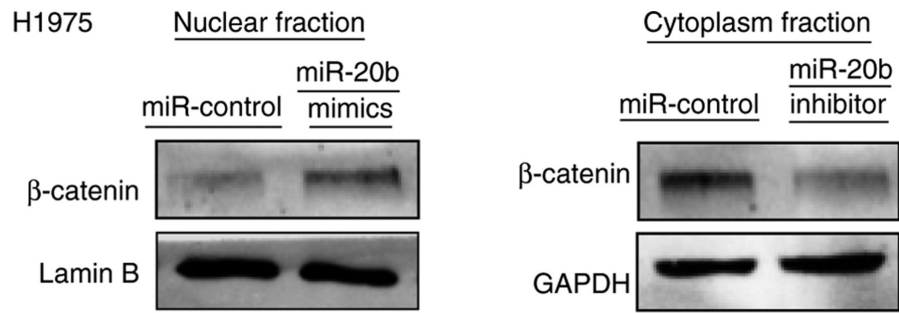

Supplement: Supplementary_Data.pdf [file Supplementary_Data.pdf]
